# Supplementary material for: Submarine Landslide Source Modeling using the 3D Slope Stability Analysis Method for the 2018 Palu-Sulawesi Tsunami
Source: Copernicus journal article supplement (doi:10.5194/nhess-2021-170), 2021-06-22
Supplement: Supplementary file [file nhess-2021-170-AC1-supplement.pdf]

# SIMULATED COASTAL LANDSLIDES

## Simulation No. 12

Date: 9/18/2020

Range of Inclination Angle: 15 – 20

Earthquake Intensity: 0.30

Surface Thickness: 6m

### Simulated Coastal Landslides

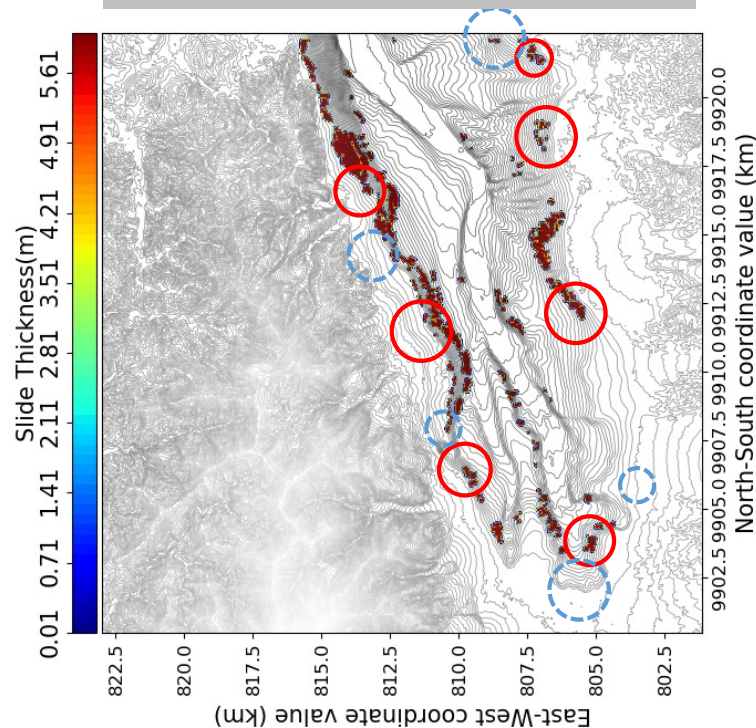

### Literature's Coastal Landslides

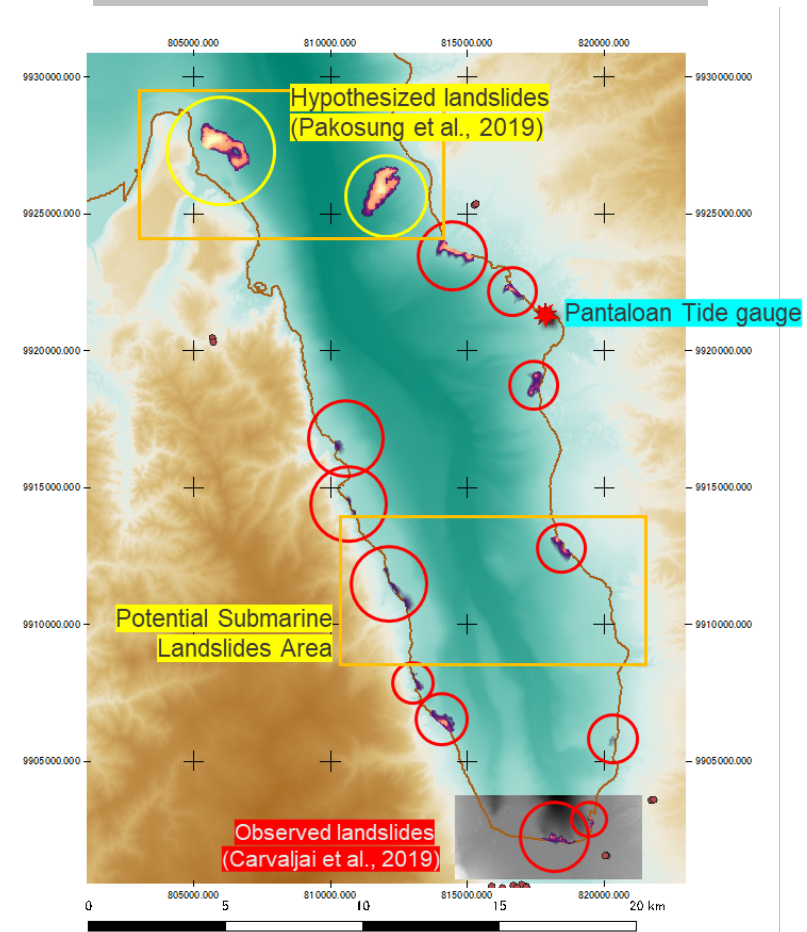

○ Matching Landslide Location    ◌ Un-Matching Landslide Location
